# Supplementary material for: AQAFI: a bioanalytical method for automated KPIs quantification of fluorescent images of human leukocytes and micro–nano particles
Source: Royal Society of Chemistry journal article supplement (doi:10.1039/d3an01166f), 2023-01-01
Supplement: d3an01166f2.pdf [file d3an01166f2.pdf]

Supplementary Information  
AQAFI: A Bioanalytical Method for Automated  
KPIs Quantification of Fluorescent Images of  
Human Leukocytes and Micro-Nano Particles

Muhammad A. Sami <sup>\*†</sup>      Muhammad Nabeel Tahir <sup>\*†</sup>  
Umer Hassan <sup>\*‡§</sup>

---

<sup>\*</sup>Department of Electrical and Computer Engineering at Rutgers, The State University of New Jersey, New Brunswick, NJ 08901, USA.

<sup>†</sup>These authors contributed equally,

<sup>‡</sup>Global Health Institute at Rutgers, The State University of New Jersey, New Brunswick, NJ 08901, USA.

<sup>§</sup>corresponding author.

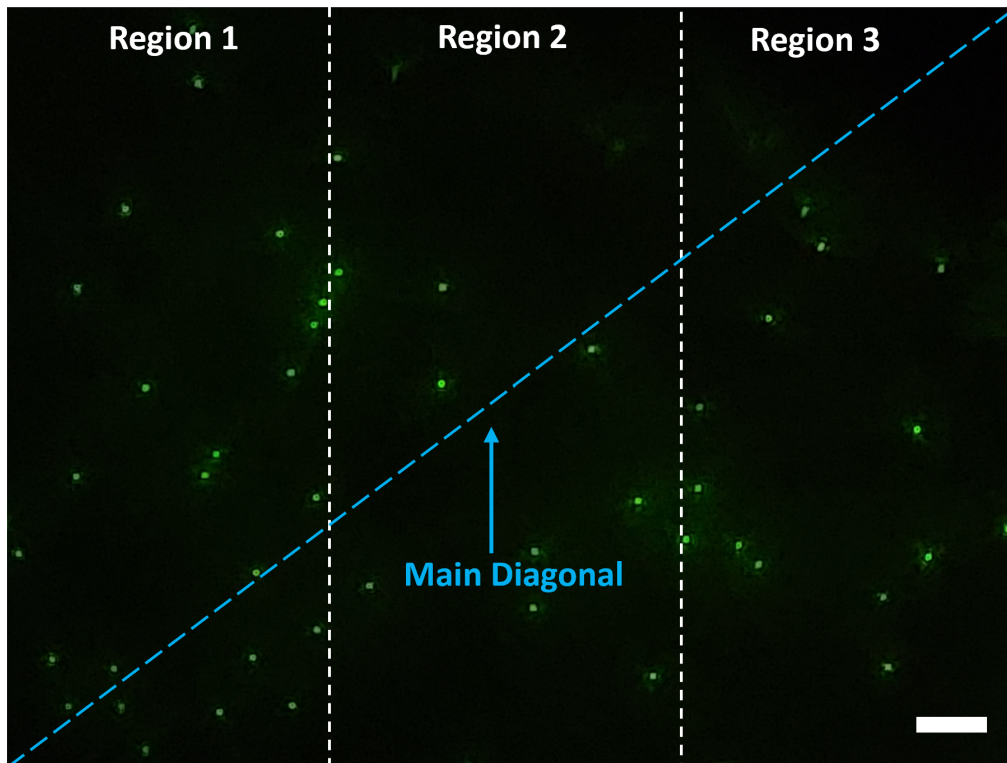

Fig. S 1: Bead selection criteria showcased on  $2\ \mu\text{m}$  green fluorescent particles imaged from the smartphone fluorescence microscope at 4.2 V. (Scale bar =  $50\ \mu\text{m}$ ).

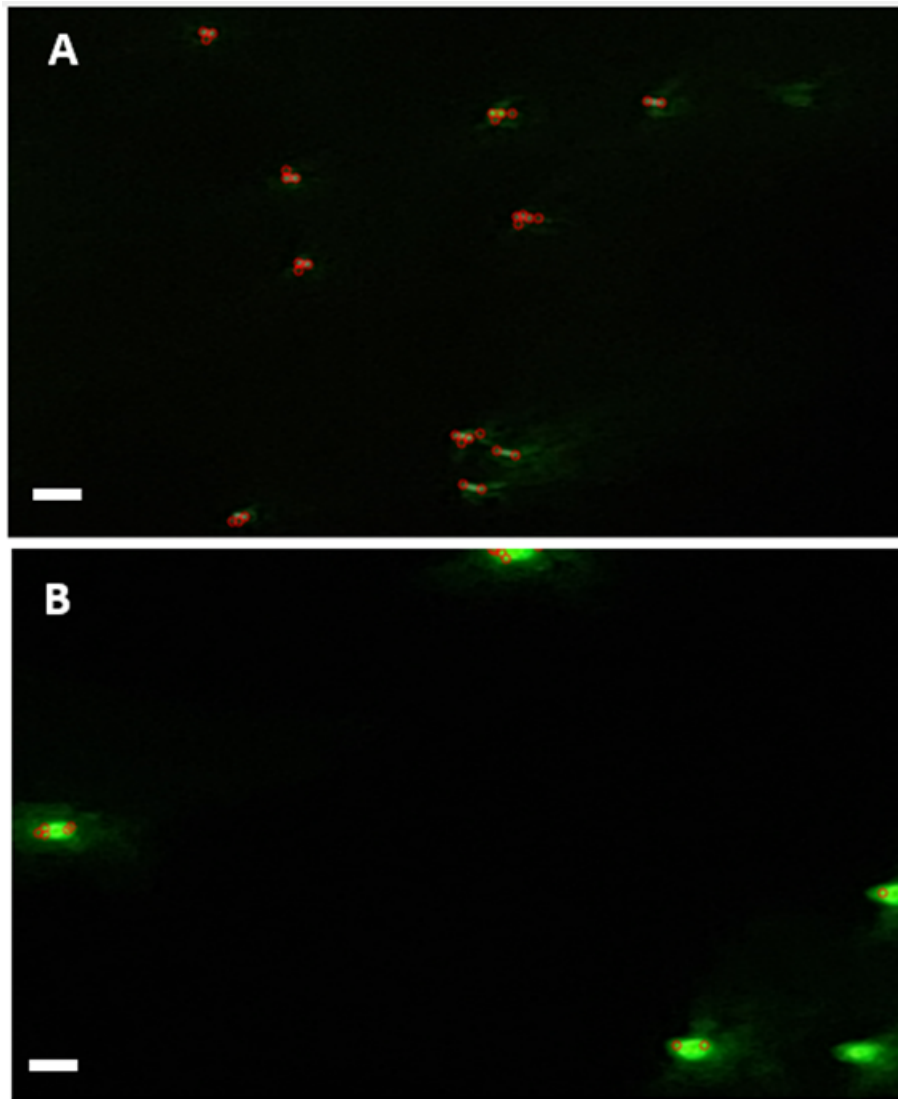

Fig. S 2: (a) Features detected on  $2 \mu m$  green fluorescent particles imaged from the smartphone fluorescence microscope at 4.3 V. (b) Features detected on  $8 \mu m$  green fluorescent particles imaged from the smartphone fluorescence microscope at 3.8 V. (Scale bar =  $10 \mu m$ ).

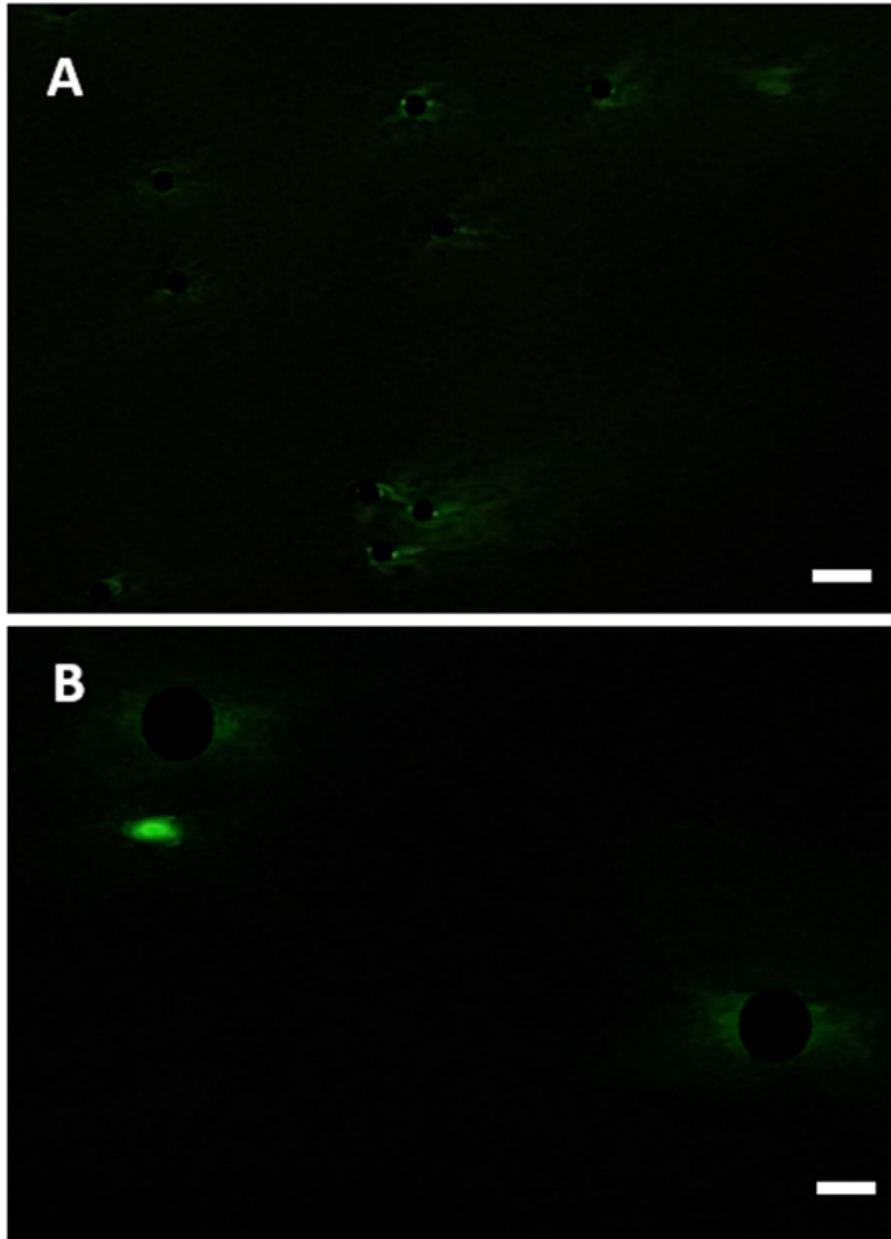

Fig. S 3: (a) Circular bead region removal on  $2 \mu m$  green fluorescent particles imaged from the smartphone fluorescence microscope at 4.3 V. (Scale bar =  $5 \mu m$ ) (b) Circular bead region removal on  $8 \mu m$  green fluorescent particles imaged from the smartphone fluorescence microscope at 3.8 V. (Scale bar =  $10 \mu m$ ).

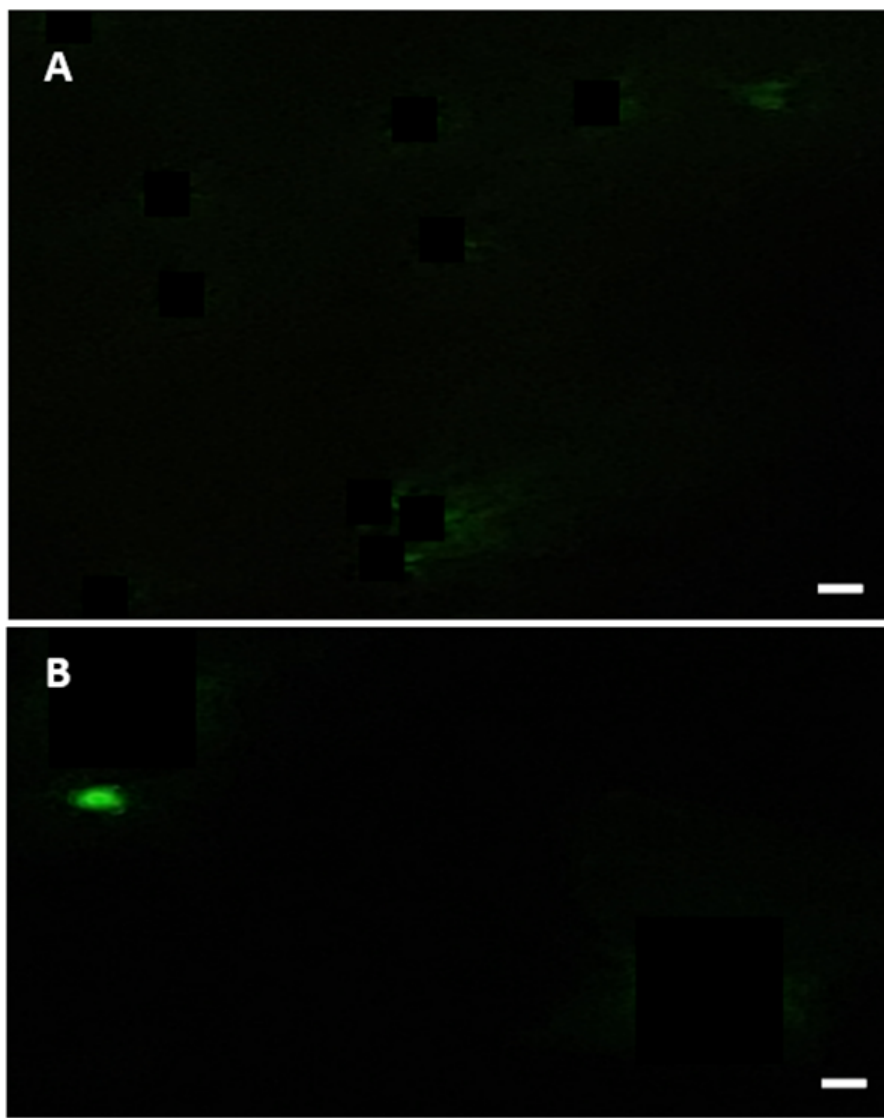

Fig. S 4: (a) Box region removal around detected beads on  $2 \mu m$  green fluorescent particles imaged from the smartphone fluorescence microscope at 4.3 V. (Scale bar =  $5 \mu m$ ) (b) Box region removal around detected beads on  $8 \mu m$  green fluorescent particles imaged from the smartphone fluorescence microscope at 3.8 V. (Scale bar =  $10 \mu m$  ).

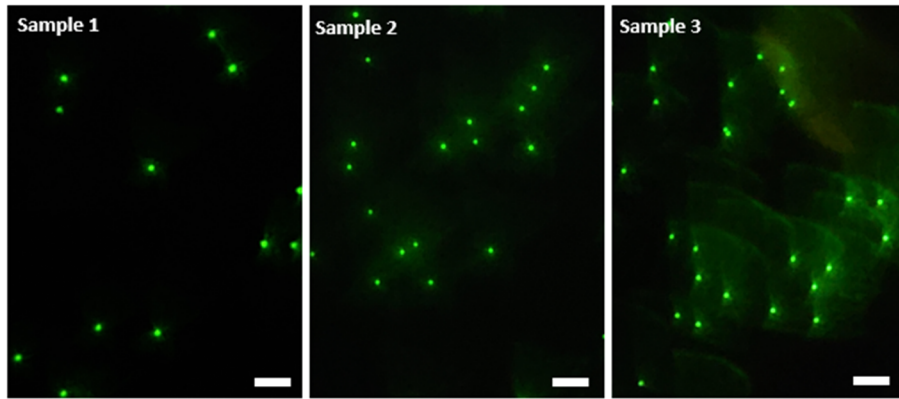

Fig. S 5: Three different samples of  $8 \mu m$  green fluorescent particles imaged from the smartphone fluorescence microscope at 3.8 V. (Scale bar =  $45 \mu m$  ).

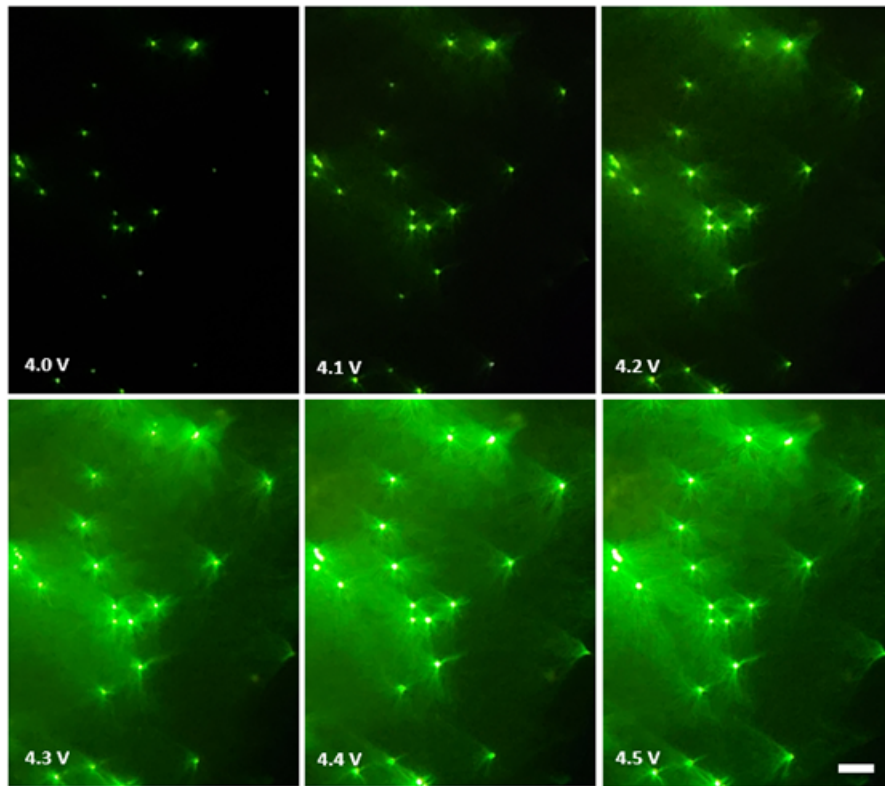

Fig. S 6: Fluorescently tagged human peripheral blood leukocytes imaged using the SFM at excitation voltage ranging from 4.0 to 4.5 V. (Scale bar =  $45 \mu m$  ).

| <b>Bead size</b> | <b>Optimal excitation voltage</b> |
|------------------|-----------------------------------|
| <b>0.8</b>       | 4.3 – 4.5 V                       |
| <b>1.0</b>       | 4.3 – 4.5 V                       |
| <b>2.0</b>       | 4.1 – 4.3 V                       |
| <b>8.3</b>       | 3.8V                              |

Table 1: Optimal excitation voltage range for the four different green fluorescent beads imaged using the smartphone fluorescence microscope.

| <b>Bead Size</b> | <b>Distance Threshold (pixels)</b> | <b>Fast Feature Intensity Threshold (Intensity)</b> | <b>Bead radius in image space ‘<math>\alpha</math>’ (pixels)</b> | <b>Box size ‘s’ (pixels)</b> |
|------------------|------------------------------------|-----------------------------------------------------|------------------------------------------------------------------|------------------------------|
| <b>0.8</b>       | 30                                 | 13                                                  | 4                                                                | 8                            |
| <b>1.0</b>       | 30                                 | 12                                                  | 4                                                                | 8                            |
| <b>2.0</b>       | 40                                 | 20                                                  | 6                                                                | 12                           |
| <b>8.3</b>       | 40                                 | 22                                                  | 13                                                               | 40                           |

Table 2: Input metrics used by the algorithm for the quantitative assessment of the quantity of fluorescent bead images captured using the smartphone fluorescence microscope.

| Sample Number | Bead Intensity |        | Vicinity Noise |       | Background Noise |      | SDNR   |       | CNR    |       |
|---------------|----------------|--------|----------------|-------|------------------|------|--------|-------|--------|-------|
|               | ImageJ         | Algo   | ImageJ         | Algo  | ImageJ           | Algo | ImageJ | Algo  | ImageJ | Algo  |
| <b>S1</b>     | 108.8          | 117.77 | 13.6           | 4.32  | 3                | 1.64 | 31.73  | 68.89 | 3.76   | 16.79 |
| <b>S2</b>     | 108.7          | 107.48 | 15             | 11.34 | 3                | 4.93 | 31.23  | 19.49 | 2.32   | 1.80  |
| <b>S3</b>     | 116.5          | 101.22 | 18.8           | 3.44  | 4                | 1.02 | 24.42  | 95.55 | 1.35   | 38.02 |

Table 3: Image quality metrics for 8.3  $\mu m$  green fluorescent beads calculated manually using ImageJ and using the designed algorithm.
